# Supplementary material for: Ganglioside SSEA-4 in Ewing sarcoma marks a tumor cell population with aggressive features and is a potential cell-surface immune target
Source: PubMed Central journal article supplement (PMC11126692; doi:10.1038/s41598-024-62849-8), 2024-05-24
Supplement: 41598_2024_62849_MOESM4_ESM.pdf [file 41598_2024_62849_MOESM4_ESM.pdf]

**Supplementary Table 2. Authentication of cell lines.** The identity of the cell lines was confirmed by short tandem repeat (STR) profiling. \*<http://www.dsmz.de/fp/cgi-bin/str.html>

| Cell line | D3S1358 | vWA   | FGA   | Amelogenin | TH01  | TPOX | CSF1PO | D5S818 | D13S317 | D16S539  | D7S820 | Cell bank profile available?* |                |
|-----------|---------|-------|-------|------------|-------|------|--------|--------|---------|----------|--------|-------------------------------|----------------|
| TC-71     | 15,17   | 17,18 | 24,26 | x,y        | 9.30  | 8,9  | 10,11  | 10     | 11,12   | 11,14    | 10     | Yes                           | 100% Match     |
| MS-EwS-15 | 15,17   | 17,18 | 20,22 | x,y        | 6.00  | 8    | 10,11  | 11     | 14      | 12,13    | 8,11   | No                            | Unique Profile |
| MS-EwS-6  | 14      | 16,17 | 20,24 | x,y        | 6.00  | 8    | 10,12  | 13     | 8,13    | 8,11     | 12,13  | No                            | Unique Profile |
| MS-EwS-16 | 15,16   | 16,18 | 20,26 | x,y        | 6,7   | 8,10 | 10,11  | 13     | 8,12    | 11       | 8,11   | No                            | Unique Profile |
| TC-32     | 15,16   | 15,18 | 23,24 | x          | 6,9.3 | 9,11 | 11,13  | 12,13  | 10,12   | 13,14    | 8,11   | No                            | Unique Profile |
| A4573     | 16,17   | 18,19 | 24    | x          | 7.80  | 8,10 | 11,13  | 11,12  | 8,10    | 12       | 11     | No                            | Unique Profile |
| Cado-ES-1 | 16,18   | 14,18 | 21,22 | x          | 6.90  | 8,11 | 11,12  | 11,12  | 10,13   | 9,11     | 11,13  | Yes                           | 100% Match     |
| RD-ES     | 15      | 17    | 21,25 | x,y        | 7.00  | 9,11 | 11     | 11     | 11,12   | 9,11     | 10     | Yes                           | 100% Match     |
| 5838      | 16      | 15,18 | 20,22 | x,y        | 9.30  | 8    | 11     | 10     | 13      | 9,11     | 11     | No                            | Unique Profile |
| WE-68     | 15,18   | 16,18 | 19,23 | x          | 6,8   | 8,10 | 12     | 11     | 9,11    | 12       | 10,12  | No                            | Unique Profile |
| TTC-466   | 17,18   | 15,17 | 24,25 | x          | 7.00  | 8    | 10     | 10     | 10,12   | 11,12    | 8,10   | No                            | Unique Profile |
| A673      | 14      | 15,18 | 19,20 | x          | 9.30  | 8    | 11,12  | 11,12  | 8,13    | 11       | 10,12  | Yes                           | 100% Match     |
| SK-N-MC   | 15      | 17,18 | 21,25 | x          | 9.30  | 9,11 | 10     | 11     | 11      | 12       | 8      | Yes                           | 100% Match     |
| VH-64     | 16,17   | 15,19 | 22,23 | x          | 6.00  | 8    | 11,12  | 12,13  | 8,11    | 12       | 12     | No                            | Unique Profile |
| NTERA-2   | 16      | 18,19 | 23    | x,y        | 9.3   | 8    | 10,12  | 9,12   | 13      | 11,12,13 | 10,12  | Yes                           | 100% Match     |
| HT-1080   | 16      | 14,19 | 22,25 | x,y        | 6     | 8    | 12,13  | 11,13  | 14      | 9,12     | 9.1    | Yes                           | 100% Match     |
| SUP-B15   | 15,16   | 15,17 | 19,20 | x,y        | 6,9.3 | 8,9  | 11,12  | 12,13  | 8,14    | 11,12    | 10,11  | Yes                           | 100% Match     |

\*<http://www.dsmz.de/fp/cgi-bin/str.html>
